# Supplementary material for: Targeting XBP1-mediated β-catenin expression associated with bladder cancer with newly synthetic Oridonin analogues
Source: PubMed Central journal article supplement (PMC5302956; doi:10.18632/oncotarget.10863), 2016-07-27
Supplement: oncotarget-07-56842-s001.pdf [file oncotarget-07-56842-s001.pdf]

## Targeting XBP1-mediated $\beta$ -catenin expression associated with bladder cancer with newly synthetic Oridonin analogues

### SUPPLEMENTARY TABLES AND FIGURES

Supplementary Table S1: Primers for qRT-PCR, CTNNB1 promoter cloning and ChIP assay

| Primers for qRT-PCR                 |                                                  |                        |
|-------------------------------------|--------------------------------------------------|------------------------|
| Gene                                | Forward                                          | Reverse                |
| 18S                                 | GGAATTGACGGAAGGGCACCACC                          | GTGCAGCCCCGGACATCTAAGG |
| CTNNB1                              | ACTACTGTGGACCACAAGCAGAG                          | AGTCCCAAGGAGACCTTCCATC |
| XBP1                                | GGAGTTAAGACAGCGCTTGG                             | ACTGGGTCCAAGTTGTCCAG   |
| Primers for CTNNB1 promoter cloning |                                                  |                        |
| Forward                             | GCTGCGATGCGGTACCGAACGAACCTTCTTTACAATACTGGCATAT   |                        |
| Reverse                             | GCGACTCGATCTCGAGACGCTGCTGCCACAGACCGAGAGGCTTAAAAT |                        |
| Primers for ChIP assay              |                                                  |                        |
| Set                                 | Forward                                          | Reverse                |
| Control                             | AAGCCTCTGTTTTAGCGAAGG                            | ACCCCGGGTTTGACATAAAT   |
| P1                                  | CCCGATGCAGACCACAG                                | CGCAGAAGCCGCTGTAT      |
| P2                                  | GCTCAGACGGCAGCAGAC                               | GACCGAGAGGCTTAAAATGG   |

**Supplementary Table S2: IC<sub>50</sub> of TCC-SUP, T24, and UMUC3 for various chemotherapeutics (www.cancerrxgene.org)**

| Cell line | IC50 (μM) |             |             |              |             |             |
|-----------|-----------|-------------|-------------|--------------|-------------|-------------|
|           | Cisplatin | Doxorubicin | Vinblastine | Methotrexate | Mitomycin C | Gemcitabine |
| TCC-SUP   | 5.5616    | 0.2455      | 0.0051      | 13.9548      | 0.2458      | 2.0763      |
| T24       | 7.0357    | 0.0860      | 0.0079      | 12.7190      | 0.1018      | 0.0162      |
| UMUC3     | 8.4988    | 1.2308      | 0.0236      | 8.5696       | 0.4817      | 1.1679      |

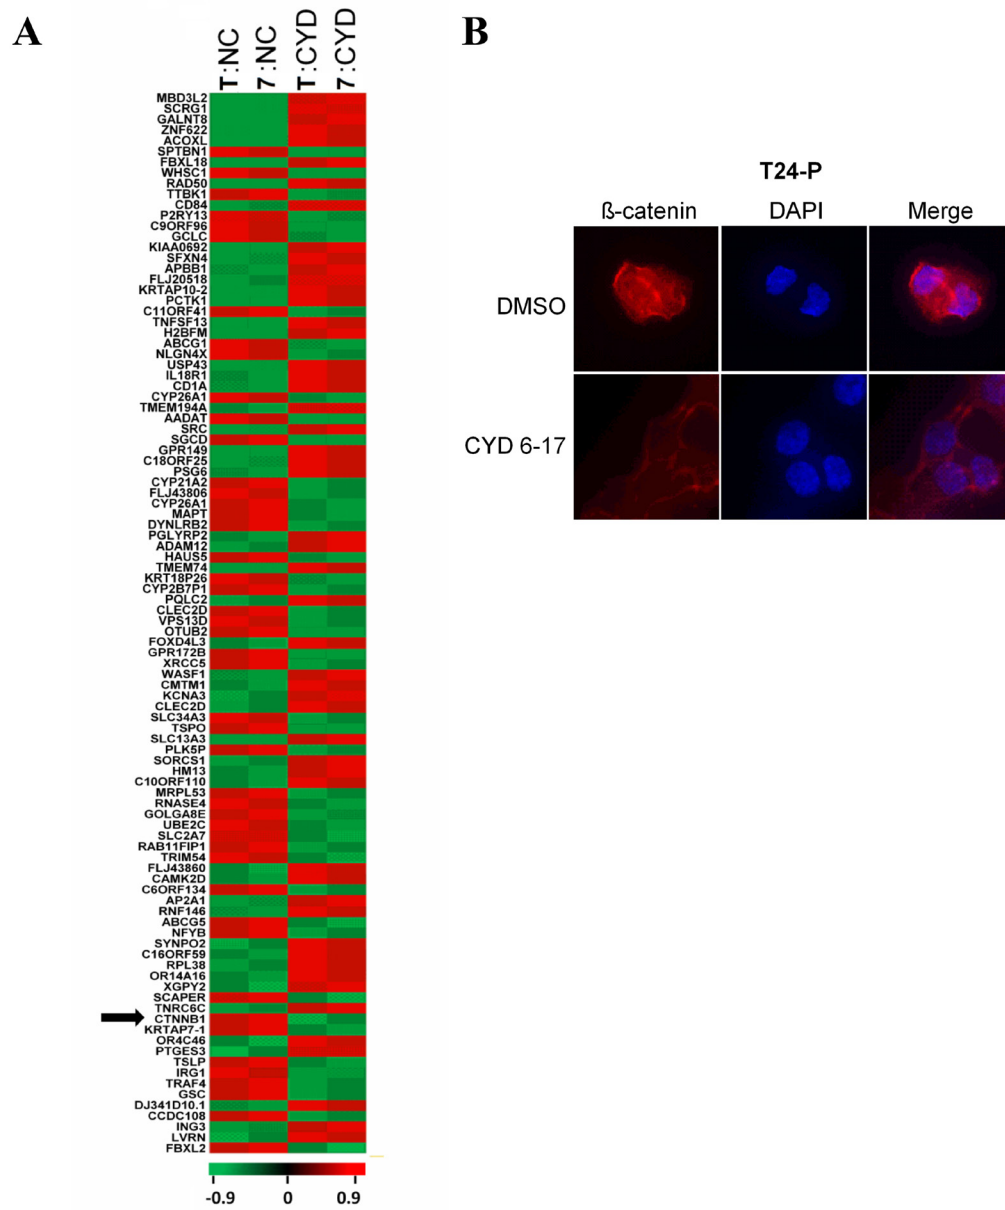

**Supplementary Figure S1:** **A.** Heat map of the gene expression profile regulated by CYD 6-17 treatment in T24-B and 786-O. Black arrow indicates CTNNB1. T: T24-B; 7: 786-O. NC: negative control; CYD: CYD 6-17 treated. Scale bar shown for Z score value. **B.** Immunofluorescence staining of  $\beta$ -catenin expression after CYD 6-17 treatment for 12 h in T24-P cells.

**A**

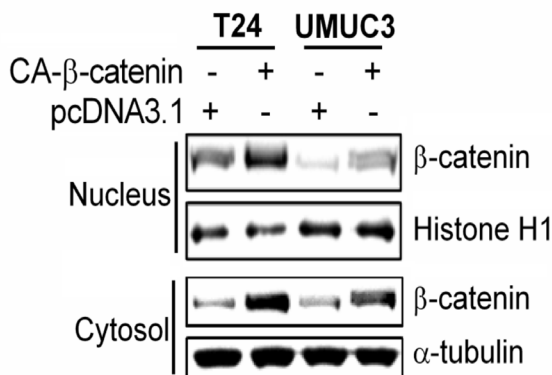

**B**

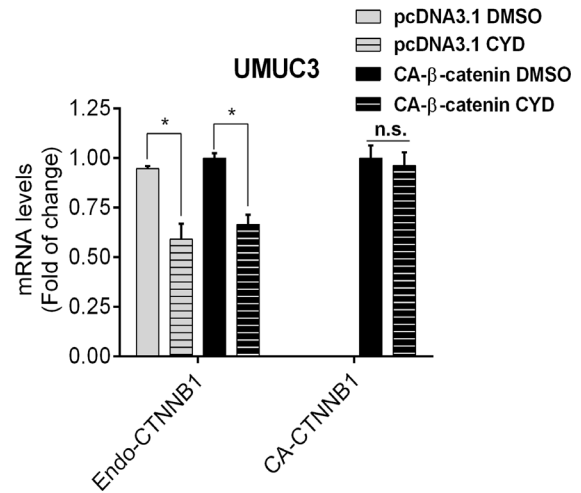

**C**

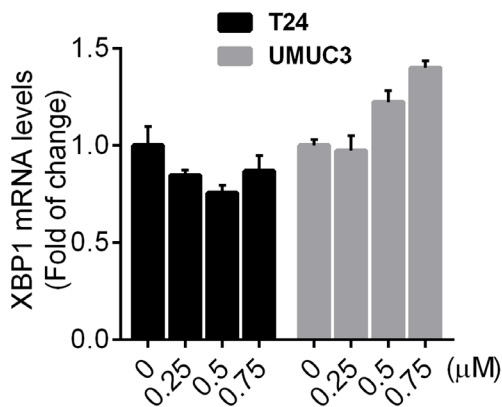

**D**

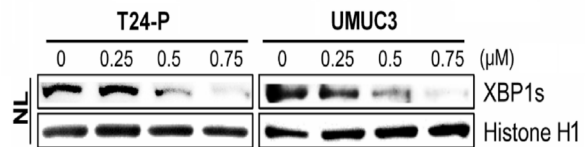

**Supplementary Figure S2: A.** Effect of CYD 6-17 on the mRNA expression from endogenous β-catenin or exogenous CA-β-catenin in UMUC3 cells. \*,  $p < 0.05$ . **B.** XBP1 mRNA expression in TCC cells after CYD 6-17 treatment. **C.** Expression of β-catenin in nuclear and cytosol fractions in T24-P and UMUC3 cells transfected with CA-β-catenin or vector. **D.** Effect of CYD 6-17 on the expression of XBP1s in nuclear lysate (NL) in T24-P and UMUC3 12 h after treatment.
